# Supplementary material for: An Exploration of Novel Bioactives from the Venomous Marine Annelid Glycera alba
Source: MDPI journal article supplement (doi:10.3390/toxins15110655), 2023-11-14
Supplement: s1 [file s1]

## Supplementary Materials: An exploration on novel bioactives from the venomous marine Polychaeta *Glycera alba*

Sónia Campos<sup>1,2</sup>, Ana P. Rodrigo<sup>1,2</sup>, Inês Moutinho cabral<sup>1,2</sup>, Vera M. Mendes<sup>3</sup>, Bruno Manadas<sup>3</sup>, Mariaelena D'Ambrosio<sup>1,2,\*</sup>, Pedro M. Costa<sup>1,2,\*</sup>

**Table S1.** Identified putative *G. alba* toxins, with respective species in which the molecular weight has been described (kDa). The potential toxins are classified into five functional categories, according to von Reumont et al. (2014).

| Peptide               | Molecular weight (kDa) | Category            | Species                                        | Reference                  |
|-----------------------|------------------------|---------------------|------------------------------------------------|----------------------------|
| Actinoporin           | 20                     | Pore-forming        | <i>G. dibranchiata</i>                         | von Reumont et al. [18]    |
| SNTx-like toxin       | 150                    | Pore-forming        | <i>S. horrida</i>                              | Nagai [56]                 |
| Sphingomyelinase      | 70-75                  | Pore-forming        | Mammalian cells                                | Liscovitch [57]            |
| Glycerotoxin          | 150                    | Neurotoxin          | <i>G. tridactyla</i>                           | Richter et al. [22]        |
| ShKT Domain           | 4                      | Neurotoxin          | <i>S. helianthus</i>                           | Rangaraju et al. [58]      |
| Cystatin              | 13                     | Protease inhibitors | All nucleated cells                            | Chew et al. [59]           |
| Kunitz Domain         | 6                      | Protease inhibitors | <i>B. taurus</i>                               | Durani and Magliery [60]   |
| Lipocalin             | 25                     | Protease inhibitors | <i>H. sapiens</i>                              | Singer et al. [61]         |
| Serpin                | 35-50                  | Protease inhibitors | <i>T. molitor</i>                              | Jiang et al. [62]          |
| CAP Domain            | ~15                    | CAP Domain          | <i>S. cerevisiae</i>                           | Darwiche et al. [63]       |
| C-type Lectin         | 15                     | Other enzymes       | <i>T. nattereri</i>                            | Lopes-Ferreira et al. [64] |
| Chitinase             | 20-90                  | Other enzymes       | Bacteria, fungi, plants, arthropods and humans | Hamid et al. [65]          |
| Hyaluronidase         | 53                     | Other enzymes       | <i>A. natalensis</i>                           | Barth et al. [66]          |
| Phospholipase         | 16-18                  | Other enzymes       | <i>A. cerana</i>                               | Shen et al. [67]           |
| Peptidase S1          | 25-40                  | Other enzymes       | Viperidae                                      | Murayama et al. [68]       |
| Peptidase S10         | 48                     | Other enzymes       | <i>A. zychae</i>                               | Lee et al. [69]            |
| Metalloproteinase M12 | 20-30                  | Other enzymes       | <i>E. pennicornis</i>                          | Price et al. [70]          |

**Table S2.** Identification of toxin and venom-related proteins in *Glycera alba*. Peptidic sequences' protein match, with respective accession, number of matched peptides and percentage of coverage (95% confidence) - %Cov(95). P1 - Proboscis replicate 1; P2 - Proboscis replicate 2; S1 - Skin replicate 1; S2 - Skin replicate 2.

| Accession  | Peptide<br>sP1 | Peptide<br>P2 | Peptide<br>sS1 | Peptide<br>sS2 | %Cov(95)<br>P1 | %Cov(95)<br>P2 | %Cov(95)<br>S1 | %Cov(95)<br>S2 | Protein                                                                                                                                                    | Organism                       |
|------------|----------------|---------------|----------------|----------------|----------------|----------------|----------------|----------------|------------------------------------------------------------------------------------------------------------------------------------------------------------|--------------------------------|
| A0A1U9VX98 | 29             | 29            | NA             | NA             | 28.87          | 29.37          | NA             | NA             | Glycerotoxin paralog 1                                                                                                                                     | <i>Glycera tridactyla</i>      |
| A0A144KPJ6 | 9              | 9             | 4              | 7              | 2.52           | 3.45           | 1.49           | 1.61           | Nonribosomal peptide synthetase TES                                                                                                                        | <i>Alternaria alternata</i>    |
| Q01886     | 5              | 2             | 4              | 3              | 1.44           | 0.61           | 1.32           | 1.48           | HC-toxin synthetase                                                                                                                                        | <i>Cochliobolus carbonum</i>   |
| Q12053     | 4              | 5             | 4              | 2              | 2.13           | 3.22           | 3.22           | 1.52           | Norsolorinic acid synthase                                                                                                                                 | <i>Aspergillus parasiticus</i> |
| A0A2G5IC96 | 4              | NA            | NA             | NA             | 2.04           | NA             | NA             | NA             | Non-reducing polyketide synthase CTB1                                                                                                                      | <i>Cercospora beticola</i>     |
| C9K7B5     | 4              | 6             | 3              | 1              | 1.56           | 1.63           | 1.26           | 0.32           | AM-toxin synthetase AMT1                                                                                                                                   | <i>Alternaria alternata</i>    |
| C9K7I3     | 3              | NA            | NA             | NA             | 5.46           | NA             | NA             | NA             | Aconitase AMT8-2                                                                                                                                           | <i>Alternaria alternata</i>    |
| Q01833     | 3              | NA            | 1              | 1              | 2.12           | NA             | 0.61           | 0.61           | Complement C3 [Cleaved into: Complement C3 beta chain; Complement C3 alpha chain; C3a anaphylatoxin; Complement C3b alpha' chain; Complement C3f fragment] | <i>Naja naja</i>               |
| V5Y0F7     | 3              | 2             | 2              | 1              | 1.92           | 1.36           | 1.96           | 0.55           | Reducing polyketide synthase AFT16-1                                                                                                                       | <i>Alternaria alternata</i>    |
| A0A084B9Z6 | 3              | 3             | 2              | 1              | 1.38           | 1.27           | 1.00           | 0.42           | Non-reducing polyketide synthase SAT8                                                                                                                      | <i>Stachybotrys chartarum</i>  |

| Accession  | Peptide<br>sP1 | Peptide<br>P2 | Peptide<br>sS1 | Peptide<br>sS2 | %Cov(95)<br>P1 | %Cov(95)<br>P2 | %Cov(95)<br>S1 | %Cov(95)<br>S2 | Protein                                                                                                                             | Organism                        |
|------------|----------------|---------------|----------------|----------------|----------------|----------------|----------------|----------------|-------------------------------------------------------------------------------------------------------------------------------------|---------------------------------|
| D9N1A1     | 3              | 1             | 3              | NA             | 1.06           | 0.28           | 1.63           | NA             | Highly reducing polyketide synthase ACTTS3                                                                                          | <i>Alternaria alternata</i>     |
| A0A1U9VX95 | 2              | 3             | NA             | 1              | 27.02          | 28.86          | NA             | 0.92           | Glycerotoxin paralog 1                                                                                                              | <i>Glycera tridactyla</i>       |
| P0DQE6     | 2              | 1             | NA             | 1              | 18.44          | 11.35          | NA             | 11.35          | U-scoloptoxin(17)-Er3a                                                                                                              | <i>Ethmostigmus rubripes</i>    |
| P0DMY0     | 2              | NA            | NA             | 2              | 16.25          | NA             | NA             | 16.25          | Kappa-actitoxin-Avd4f                                                                                                               | <i>Anemonia viridis</i>         |
| P07231     | 2              | NA            | 1              | NA             | 16.00          | NA             | 8.00           | NA             | Conantokin-G                                                                                                                        | <i>Conus geographus</i>         |
| A8S6B6     | 2              | NA            | NA             | NA             | 10.92          | NA             | NA             | NA             | Cysteine-rich venom protein                                                                                                         | <i>Austrelaps superbus</i>      |
| A0A443HK11 | 2              | 3             | NA             | 3              | 5.43           | 7.36           | NA             | 7.71           | FAD-binding monooxygenase VdtE                                                                                                      | <i>Byssochlamys spectabilis</i> |
| B5U2W0     | 2              | NA            | NA             | NA             | 5.00           | NA             | NA             | NA             | Venom serine protease Bi-VSP                                                                                                        | <i>Bombus ignitus</i>           |
| Q1PS45     | 2              | NA            | 1              | 1              | 4.44           | NA             | 3.95           | 1.97           | Zinc metalloproteinase-disintegrin-like agkihadagin                                                                                 | <i>Deinagkistrodon acutus</i>   |
| A0A0D9MRV9 | 2              | 3             | NA             | 1              | 4.17           | 4.92           | NA             | 2.46           | O-methylsterigmatocystin oxidoreductase                                                                                             | <i>Aspergillus flavus</i>       |
| Q4WMK0     | 2              | 1             | 1              | 1              | 3.07           | 3.88           | 2.04           | 2.04           | C6 finger domain transcription factor gliZ                                                                                          | <i>Neosartorya fumigata</i>     |
| A0A3G9HRC2 | 2              | 1             | NA             | NA             | 2.09           | 2.72           | NA             | NA             | Bifunctional cytochrome P450/NADPH--P450 reductase ALT2 [Includes: Cytochrome P450 monooxygenase; NADPH--cytochrome P450 reductase] | <i>Alternaria alternata</i>     |

| Accession  | Peptide<br>sP1 | Peptide<br>P2 | Peptide<br>sS1 | Peptide<br>sS2 | %Cov(95)<br>P1 | %Cov(95)<br>P2 | %Cov(95)<br>S1 | %Cov(95)<br>S2 | Protein                                                                                                                                                                                                                                                                                                                                                          | Organism                           |
|------------|----------------|---------------|----------------|----------------|----------------|----------------|----------------|----------------|------------------------------------------------------------------------------------------------------------------------------------------------------------------------------------------------------------------------------------------------------------------------------------------------------------------------------------------------------------------|------------------------------------|
| N4WHA7     | 2              | 1             | NA             | 1              | 1.63           | 0.65           | NA             | 0.37           | Reducing polyketide synthase PKS2                                                                                                                                                                                                                                                                                                                                | <i>Cochliobolus heterostrophus</i> |
| Q2UVX4     | 2              | 3             | NA             | 1              | 1.63           | 2.83           | NA             | 0.72           | Complement C3 [Cleaved into: Complement C3 beta chain; Complement C3 alpha chain; C3a anaphylatoxin; C3-beta-c; Acylation stimulating protein; Complement C3b alpha' chain; Complement C3c alpha' chain fragment 1; Complement C3dg fragment; Complement C3g fragment; Complement C3d fragment; Complement C3f fragment; Complement C3c alpha' chain fragment 2] | <i>Bos taurus</i>                  |
| Q8TGA2     | 2              | NA            | 2              | 1              | 1.62           | NA             | 1.32           | 0.90           | Fatty acid synthase alpha subunit aflA [Includes: 3-oxoacyl-[acyl-carrier-protein] reductase; 3-oxoacyl-[acyl-carrier-protein] synthase]                                                                                                                                                                                                                         | <i>Aspergillus parasiticus</i>     |
| A0A3G9H990 | 2              | NA            | 1              | 2              | 1.56           | NA             | 0.50           | 1.26           | Highly reducing polyketide synthase ALT1                                                                                                                                                                                                                                                                                                                         | <i>Alternaria alternata</i>        |
| Q4WMJ7     | 2              | NA            | NA             | NA             | 1.41           | NA             | NA             | NA             | Nonribosomal peptide synthetase gliP                                                                                                                                                                                                                                                                                                                             | <i>Neosartorya fumigata</i>        |

| Accession  | Peptide<br>sP1 | Peptide<br>P2 | Peptide<br>sS1 | Peptide<br>sS2 | %Cov(95)<br>P1 | %Cov(95)<br>P2 | %Cov(95)<br>S1 | %Cov(95)<br>S2 | Protein                                                                                                                                                                                                                                                                                                                           | Organism                      |
|------------|----------------|---------------|----------------|----------------|----------------|----------------|----------------|----------------|-----------------------------------------------------------------------------------------------------------------------------------------------------------------------------------------------------------------------------------------------------------------------------------------------------------------------------------|-------------------------------|
| P12387     | 2              | 1             | 2              | 4              | 1.38           | 2.34           | 1.44           | 2.76           | Complement C3 [Cleaved into: Complement C3 beta chain; C3-beta-c; Complement C3 alpha chain; C3a anaphylatoxin; Complement C3b alpha' chain; Complement C3c alpha' chain fragment 1; Complement C3dg fragment; Complement C3g fragment; Complement C3d fragment; Complement C3f fragment; Complement C3c alpha' chain fragment 2] | <i>Cavia porcellus</i>        |
| I2C090     | 2              | NA            | NA             | 1              | 1.28           | NA             | NA             | 0.67           | Ophiophagus venom factor [Cleaved into: OVF alpha chain; OVF gamma chain; OVF beta chain]                                                                                                                                                                                                                                         | <i>Ophiophagus hannah</i>     |
| A0A084API3 | 2              | NA            | 1              | 3              | 1.05           | NA             | 0.80           | 1.72           | Highly reducing polyketide synthase SAT13                                                                                                                                                                                                                                                                                         | <i>Stachybotrys chartarum</i> |
| R4WH05     | 2              | 1             | 2              | 1              | 0.88           | 0.60           | 0.95           | 1.23           | Highly reducing polyketide synthase ACRTS2                                                                                                                                                                                                                                                                                        | <i>Alternaria alternata</i>   |
| P82421     | 1              | 1             | NA             | NA             | 45.83          | 45.83          | NA             | NA             | U1-poneritoxin-Ng2a                                                                                                                                                                                                                                                                                                               | <i>Neoponera goeldii</i>      |
| Q45RU8     | 1              | NA            | NA             | NA             | 25.00          | NA             | NA             | NA             | Conotoxin S5.1                                                                                                                                                                                                                                                                                                                    | <i>Conus striatus</i>         |
| Q6PN83     | 1              | NA            | NA             | NA             | 23.44          | NA             | NA             | NA             | Conotoxin mr5.3                                                                                                                                                                                                                                                                                                                   | <i>Conus marmoreus</i>        |

| Accession | Peptide<br>sP1 | Peptide<br>P2 | Peptide<br>sS1 | Peptide<br>sS2 | %Cov(95)<br>P1 | %Cov(95)<br>P2 | %Cov(95)<br>S1 | %Cov(95)<br>S2 | Protein                                   | Organism                            |
|-----------|----------------|---------------|----------------|----------------|----------------|----------------|----------------|----------------|-------------------------------------------|-------------------------------------|
| P69940    | 1              | 1             | NA             | NA             | 12.64          | 17.24          | NA             | NA             | Potassium channel toxin<br>TsTXK-beta     | <i>Tityus serrulatus</i>            |
| Q9BPA1    | 1              | NA            | NA             | NA             | 12.09          | NA             | NA             | NA             | Conotoxin VnMKLT1-021                     | <i>Conus ventricosus</i>            |
| Q9U659    | 1              | 1             | NA             | NA             | 11.69          | 11.69          | NA             | NA             | Conotoxin PnMKLT1-0122                    | <i>Conus pennaceus</i>              |
| P0DSK6    | 1              | NA            | NA             | 1              | 9.91           | NA             | NA             | 9.91           | U-myrmeciotoxin(01)-Mg8b                  | <i>Myrmecia gulosa</i>              |
| Q9YGI1    | 1              | 1             | 1              | 1              | 9.30           | 9.30           | 9.30           | 9.30           | Probable weak neurotoxin<br>NNAM3         | <i>Naja atra</i>                    |
| Q9DEZ9    | 1              | 2             | 1              | NA             | 7.47           | 11.20          | 7.47           | NA             | Venom nerve growth factor                 | <i>Crotalus durissus terrificus</i> |
| Q3HXY4    | 1              | NA            | NA             | NA             | 7.11           | NA             | NA             | NA             | Venom nerve growth factor                 | <i>Pseudechis porphyriacus</i>      |
| Q9BJV7    | 1              | NA            | NA             | NA             | 7.00           | NA             | NA             | NA             | Omega-hexatoxin-Asp2b                     | <i>Atrax sp.</i>                    |
| P0DSK3    | 1              | 1             | 1              | NA             | 6.67           | 6.67           | 6.67           | NA             | U-myrmeciotoxin(01)-Mg7a                  | <i>Myrmecia gulosa</i>              |
| P0CAZ2    | 1              | NA            | NA             | NA             | 6.20           | NA             | NA             | NA             | M-zodatoxin-Lt8i                          | <i>Lachesana tarabaei</i>           |
| P0DQA1    | 1              | NA            | NA             | NA             | 6.17           | NA             | NA             | NA             | U-scoloptoxin(11)-Sm6a                    | <i>Scolopendra morsitans</i>        |
| C0JB67    | 1              | NA            | NA             | NA             | 5.82           | NA             | NA             | NA             | Dermonecrotic toxin<br>SpeSicTox-betaIIA1 | <i>Sicarius peruensis</i>           |
| C0JB40    | 1              | NA            | NA             | NA             | 5.11           | NA             | NA             | NA             | Dermonecrotic toxin<br>LcsSicTox-betaIC1  | <i>Loxosceles cf. spinulosa</i>     |
| Q09GJ9    | 1              | NA            | NA             | NA             | 5.02           | NA             | NA             | NA             | Cysteine-rich venom protein               | <i>Philodryas olfersii</i>          |

| Accession  | Peptide<br>sP1 | Peptide<br>P2 | Peptide<br>sS1 | Peptide<br>sS2 | %Cov(95)<br>P1 | %Cov(95)<br>P2 | %Cov(95)<br>S1 | %Cov(95)<br>S2 | Protein                                    | Organism                         |
|------------|----------------|---------------|----------------|----------------|----------------|----------------|----------------|----------------|--------------------------------------------|----------------------------------|
| A0A443HJZ3 | 1              | NA            | NA             | NA             | 4.92           | NA             | NA             | NA             | Short-chain dehydrogenase/reductase VdtF   | <i>Byssoschlamys spectabilis</i> |
| B6H062     | 1              | NA            | 1              | NA             | 4.71           | NA             | 4.71           | NA             | Short-chain dehydrogenase/reductase prx1   | <i>Penicillium rubens</i>        |
| Q8AY79     | 1              | NA            | 1              | NA             | 4.65           | NA             | 3.10           | NA             | Beta-fibrinogenase stejnefibrase-2         | <i>Trimeresurus stejnegeri</i>   |
| P0CB14     | 1              | NA            | 1              | NA             | 4.08           | NA             | 5.75           | NA             | Snake venom metalloproteinase kistomin     | <i>Calloselasma rhodostoma</i>   |
| P09807     | 1              | 1             | NA             | NA             | 4.02           | 4.02           | NA             | NA             | Killer toxin subunit gamma                 | <i>Kluyveromyces lactis</i>      |
| B5AJT3     | 1              | NA            | NA             | NA             | 3.90           | NA             | NA             | NA             | Venom metalloproteinase 2                  | <i>Eulophus pennicornis</i>      |
| A0A084API6 | 1              | NA            | NA             | NA             | 3.80           | NA             | NA             | NA             | Trichothecene 15-O-acetyltransferase SAT16 | <i>Stachybotrys chartarum</i>    |
| Q4WTI4     | 1              | NA            | NA             | NA             | 3.66           | NA             | NA             | NA             | Transcription factor rglT                  | <i>Neosartorya fumigata</i>      |
| A0A1L4BJ98 | 1              | NA            | NA             | NA             | 3.40           | NA             | NA             | NA             | Dermonecrotic toxin HI-PLD1                | <i>Hemiscorpius lepturus</i>     |
| Q7M4I3     | 1              | NA            | NA             | 1              | 3.29           | NA             | NA             | 3.29           | Venom protease                             | <i>Bombus pennsylvanicus</i>     |
| P0DSI2     | 1              | 1             | NA             | NA             | 2.90           | 2.90           | NA             | NA             | Phospholipase A1                           | <i>Dinoponera quadriceps</i>     |
| A0A3G9HPE6 | 1              | NA            | NA             | NA             | 2.87           | NA             | NA             | NA             | Dehydrogenase ALT3                         | <i>Alternaria alternata</i>      |
| Q8I913     | 1              | NA            | NA             | NA             | 2.57           | NA             | NA             | NA             | Dermonecrotic toxin LISicTox-alphaIII3i    | <i>Loxosceles laeta</i>          |

| Accession  | Peptide<br>sP1 | Peptide<br>P2 | Peptide<br>sS1 | Peptide<br>sS2 | %Cov(95)<br>P1 | %Cov(95)<br>P2 | %Cov(95)<br>S1 | %Cov(95)<br>S2 | Protein                                                                                                                                                                                                                                                                                                                | Organism                      |
|------------|----------------|---------------|----------------|----------------|----------------|----------------|----------------|----------------|------------------------------------------------------------------------------------------------------------------------------------------------------------------------------------------------------------------------------------------------------------------------------------------------------------------------|-------------------------------|
| A0ST43     | 1              | NA            | NA             | NA             | 2.40           | NA             | NA             | NA             | FAD-dependent monooxygenase CTB5                                                                                                                                                                                                                                                                                       | <i>Cercospora nicotianae</i>  |
| B7W114     | 1              | 1             | 1              | 2              | 2.33           | 2.33           | 2.33           | 4.86           | Cephalotoxin-like protein                                                                                                                                                                                                                                                                                              | <i>Acropora millepora</i>     |
| Q8AWX7     | 1              | NA            | NA             | NA             | 2.25           | NA             | NA             | NA             | Zinc metalloproteinase-disintegrin agkistin                                                                                                                                                                                                                                                                            | <i>Gloydus halys</i>          |
| P98093     | 1              | 3             | 2              | 1              | 2.13           | 4.15           | 1.59           | 0.67           | Complement C3 [Cleaved into: Complement C3 beta chain; Complement C3 alpha chain; C3a anaphylatoxin; Complement C3b alpha' chain; Complement C3c alpha' chain fragment 1; Complement C3dg fragment; Complement C3g fragment; Complement C3d fragment; Complement C3f fragment; Complement C3c alpha' chain fragment 2] | <i>Oncorhynchus mykiss</i>    |
| A0A084B9Z8 | 1              | 2             | NA             | NA             | 2.12           | 1.19           | NA             | NA             | Ankyrin repeat domain-containing protein SAT10                                                                                                                                                                                                                                                                         | <i>Stachybotrys chartarum</i> |
| A0A3G9H9H8 | 1              | 1             | 1              | 1              | 1.99           | 1.99           | 1.99           | 1.99           | Nonribosomal peptide synthetase ALT12                                                                                                                                                                                                                                                                                  | <i>Alternaria alternata</i>   |
| Q98989     | 1              | 1             | NA             | 1              | 1.71           | 1.71           | NA             | 1.71           | Stonustoxin subunit alpha                                                                                                                                                                                                                                                                                              | <i>Synanceia horrida</i>      |
| A2R6H0     | 1              | NA            | 1              | NA             | 1.60           | NA             | 0.59           | NA             | Nonribosomal peptide synthetase otaB                                                                                                                                                                                                                                                                                   | <i>Aspergillus niger</i>      |
| Q2UXQ5     | 1              | NA            | NA             | NA             | 1.47           | NA             | NA             | NA             | Zinc metalloproteinase-disintegrin-like EoVMP2                                                                                                                                                                                                                                                                         | <i>Echis ocellatus</i>        |



| Accession  | Peptide<br>sP1 | Peptide<br>P2 | Peptide<br>sS1 | Peptide<br>sS2 | %Cov(95)<br>P1 | %Cov(95)<br>P2 | %Cov(95)<br>S1 | %Cov(95)<br>S2 | Protein                                                                                                                                                                                                                                                                         | Organism                       |
|------------|----------------|---------------|----------------|----------------|----------------|----------------|----------------|----------------|---------------------------------------------------------------------------------------------------------------------------------------------------------------------------------------------------------------------------------------------------------------------------------|--------------------------------|
| Q23647     | 1              | NA            | NA             | NA             | 1.41           | NA             | NA             | NA             | Hypersensitive to pore-forming toxin protein 40                                                                                                                                                                                                                                 | <i>Caenorhabditis elegans</i>  |
| Q2I0M6     | 1              | 2             | NA             | NA             | 1.38           | 2.87           | NA             | NA             | Dual O-methyltransferase/FAD-dependent monooxygenase CTB3 [Includes: O-methyltransferase; FAD-dependent monooxygenase]                                                                                                                                                          | <i>Cercospora nicotianae</i>   |
| Q0ZZJ6     | 1              | 4             | NA             | NA             | 1.15           | 2.48           | NA             | NA             | <i>A.superbus</i> venom factor 1 [Cleaved into: AVF-1 alpha chain; AVF-1 gamma chain; AVF-1 beta chain]                                                                                                                                                                         | <i>Austrelaps superbus</i>     |
| A0A2D0TC04 | 1              | NA            | NA             | NA             | 0.96           | NA             | NA             | NA             | Venom phosphodiesterase                                                                                                                                                                                                                                                         | <i>Naja atra</i>               |
| Q8TGA1     | 1              | 2             | NA             | NA             | 0.95           | 1.06           | NA             | NA             | Fatty acid synthase beta subunit aflB [Includes: 3-hydroxyacyl-[acyl-carrier-protein] dehydratase; Enoyl-[acyl-carrier-protein] reductase [NADH]; [Acyl-carrier-protein] acetyltransferase; [Acyl-carrier-protein] malonyltransferase; S-acyl fatty acid synthase thioesterase] | <i>Aspergillus parasiticus</i> |
| A0A125SUR3 | 1              | 2             | NA             | 2              | 0.80           | 2.39           | NA             | 1.13           | Nonribosomal peptide synthetase ACTTS4                                                                                                                                                                                                                                          | <i>Alternaria alternata</i>    |

| Accession  | Peptide<br>sP1 | Peptide<br>P2 | Peptide<br>sS1 | Peptide<br>sS2 | %Cov(95)<br>P1 | %Cov(95)<br>P2 | %Cov(95)<br>S1 | %Cov(95)<br>S2 | Protein                                                                                                                                                                                      | Organism                               |
|------------|----------------|---------------|----------------|----------------|----------------|----------------|----------------|----------------|----------------------------------------------------------------------------------------------------------------------------------------------------------------------------------------------|----------------------------------------|
| Q58L91     | 1              | NA            | NA             | NA             | 0.75           | NA             | NA             | NA             | Venom prothrombin activator<br>oscutarin-C non-catalytic<br>subunit [Cleaved into:<br>Oscutarin-C non-catalytic<br>subunit heavy chain;<br>Oscutarin-C non-catalytic<br>subunit light chain] | <i>Oxyuranus<br/>scutellatus</i>       |
| P98094     | 1              | 4             | 1              | NA             | 0.74           | 2.96           | 0.74           | NA             | Complement C3 [Cleaved<br>into: Complement C3 beta<br>chain; Complement C3 alpha<br>chain; C3a anaphylatoxin;<br>Complement C3 gamma<br>chain]                                               | <i>Eptatretus<br/>burgeri</i>          |
| A2R6H1     | 1              | 1             | 1              | 2              | 0.71           | 1.88           | 1.18           | 1.10           | Highly reducing polyketide<br>synthase otaA                                                                                                                                                  | <i>Aspergillus<br/>niger</i>           |
| P08649     | 1              | NA            | NA             | 1              | 0.69           | NA             | NA             | 0.52           | Complement C4 [Cleaved<br>into: Complement C4 beta<br>chain; Complement C4 alpha<br>chain; C4a anaphylatoxin;<br>Complement C4 gamma<br>chain]                                               | <i>Rattus<br/>norvegicus</i>           |
| A0A1R3RGK1 | 1              | 2             | NA             | NA             | 0.59           | 0.96           | NA             | NA             | Nonribosomal peptide<br>synthetase otaB                                                                                                                                                      | <i>Aspergillus<br/>carbonarius</i>     |
| A0A1R3RGK0 | 1              | 6             | NA             | 1              | 0.39           | 3.66           | NA             | 0.51           | Highly reducing polyketide<br>synthase otaA                                                                                                                                                  | <i>Aspergillus<br/>carbonarius</i>     |
| A0A443HK81 | 1              | 1             | 1              | 2              | 0.31           | 0.31           | 0.31           | 0.70           | Non-reducing polyketide<br>synthase VdtA                                                                                                                                                     | <i>Byssochlamys<br/>spectabilis</i>    |
| N4WHE3     | 1              | 1             | 1              | 2              | 0.28           | 1.35           | 0.32           | 1.27           | Reducing polyketide<br>synthase PKS1                                                                                                                                                         | <i>Cochliobolus<br/>heterostrophus</i> |

| Accession | Peptide<br>sP1 | Peptide<br>P2 | Peptide<br>sS1 | Peptide<br>sS2 | %Cov(95)<br>P1 | %Cov(95)<br>P2 | %Cov(95)<br>S1 | %Cov(95)<br>S2 | Protein                                                                                                                                                                                                                                                                                                                                                          | Organism                         |
|-----------|----------------|---------------|----------------|----------------|----------------|----------------|----------------|----------------|------------------------------------------------------------------------------------------------------------------------------------------------------------------------------------------------------------------------------------------------------------------------------------------------------------------------------------------------------------------|----------------------------------|
| B2DCR8    | NA             | 3             | 1              | NA             | NA             | 3.14           | 0.86           | NA             | SE-cephalotoxin                                                                                                                                                                                                                                                                                                                                                  | <i>Sepia esculenta</i>           |
| Q00685    | NA             | 3             | 2              | 1              | NA             | 2.09           | 2.33           | 0.72           | Complement C3 [Cleaved into: Complement C3 beta chain; Complement C3 alpha chain; C3a anaphylatoxin; Complement C3 gamma chain]                                                                                                                                                                                                                                  | <i>Lethenteron camtschaticum</i> |
| Q6DQW3    | NA             | 3             | 5              | 4              | NA             | 1.59           | 2.69           | 2.23           | Non-reducing polyketide synthase CTB1                                                                                                                                                                                                                                                                                                                            | <i>Cercospora nicotianae</i>     |
| P01026    | NA             | 2             | NA             | NA             | NA             | 1.68           | NA             | NA             | Complement C3 [Cleaved into: Complement C3 beta chain; C3-beta-c; Complement C3 alpha chain; C3a anaphylatoxin; Acylation stimulating protein; Complement C3b alpha' chain; Complement C3c alpha' chain fragment 1; Complement C3dg fragment; Complement C3g fragment; Complement C3d fragment; Complement C3f fragment; Complement C3c alpha' chain fragment 2] | <i>Rattus norvegicus</i>         |
| J3S836    | NA             | 2             | 3              | NA             | NA             | 1.03           | 2.18           | NA             | Venom factor [Cleaved into: VF alpha chain; VF gamma chain; VF beta chain]                                                                                                                                                                                                                                                                                       | <i>Crotalus adamanteus</i>       |
| A1X8D1    | NA             | 1             | 1              | 1              | NA             | 44.74          | 44.74          | 44.74          | Alpha-conotoxin-like Qc1.6                                                                                                                                                                                                                                                                                                                                       | <i>Conus quercinus</i>           |

| Accession  | Peptide<br>sP1 | Peptide<br>P2 | Peptide<br>sS1 | Peptide<br>sS2 | %Cov(95)<br>P1 | %Cov(95)<br>P2 | %Cov(95)<br>S1 | %Cov(95)<br>S2 | Protein                                                                   | Organism                      |
|------------|----------------|---------------|----------------|----------------|----------------|----------------|----------------|----------------|---------------------------------------------------------------------------|-------------------------------|
| Q9BPB2     | NA             | 1             | NA             | NA             | NA             | 17.81          | NA             | NA             | Conotoxin Asp7/Gla(3)-TxVI                                                | <i>Conus textile</i>          |
| A1X8B6     | NA             | 1             | NA             | NA             | NA             | 16.18          | NA             | NA             | Alpha-conotoxin Lp1.4                                                     | <i>Conus leopardus</i>        |
| Q75WH3     | NA             | 1             | NA             | NA             | NA             | 14.29          | NA             | NA             | U11-hexatoxin-Mg1a                                                        | <i>Macrothele gigas</i>       |
| D2Y2L0     | NA             | 1             | NA             | NA             | NA             | 13.10          | NA             | NA             | U4-theraphotoxin-Hhn1a                                                    | <i>Cyriopagopus hainanus</i>  |
| P0DPU9     | NA             | 1             | NA             | NA             | NA             | 11.94          | NA             | NA             | U-myrmeciitoxin(01)-Mg4a                                                  | <i>Myrmecia gulosa</i>        |
| C0HJV4     | NA             | 1             | NA             | NA             | NA             | 11.43          | NA             | NA             | Cytoinsectotoxin-2c                                                       | <i>Lachesana tarabaevi</i>    |
| Q0GY44     | NA             | 1             | NA             | NA             | NA             | 10.34          | NA             | NA             | Potassium channel toxin Tdi-beta-KTx                                      | <i>Tityus discrepans</i>      |
| A0A0D4WTV1 | NA             | 1             | NA             | NA             | NA             | 8.65           | NA             | NA             | Dermonecrotic toxin LarSicTox-betaID1                                     | <i>Loxosceles arizonica</i>   |
| Q1ELU7     | NA             | 1             | NA             | NA             | NA             | 8.62           | NA             | NA             | M-zodatoxin-Lt6a/c [Cleaved into: M-zodatoxin-Lt6c; M-zodatoxin-Lt6a]     | <i>Lachesana tarabaevi</i>    |
| P35775     | NA             | 1             | NA             | NA             | NA             | 7.97           | NA             | NA             | Venom allergen 2                                                          | <i>Solenopsis invicta</i>     |
| A0A6B9L6A5 | NA             | 1             | NA             | 1              | NA             | 7.08           | NA             | 3.75           | Venom hemolysin-like protein 1                                            | <i>Platyeris rhadamanthus</i> |
| K9USW8     | NA             | 1             | 1              | NA             | NA             | 5.00           | 5.00           | NA             | Dermonecrotic toxin LgSicTox-alphaIC1 [Cleaved into: U1-sicaritoxin-Lg1a] | <i>Loxosceles gaucho</i>      |
| C0JAS3     | NA             | 1             | NA             | NA             | NA             | 4.43           | NA             | NA             | Dermonecrotic toxin LhSicTox-alphaIA2bv                                   | <i>Loxosceles hirsuta</i>     |

| Accession  | Peptide<br>sP1 | Peptide<br>P2 | Peptide<br>sS1 | Peptide<br>sS2 | %Cov(95)<br>P1 | %Cov(95)<br>P2 | %Cov(95)<br>S1 | %Cov(95)<br>S2 | Protein                                                                                                     | Organism                       |
|------------|----------------|---------------|----------------|----------------|----------------|----------------|----------------|----------------|-------------------------------------------------------------------------------------------------------------|--------------------------------|
| C0JB28     | NA             | 1             | NA             | NA             | NA             | 4.35           | NA             | NA             | Dermonecrotic toxin<br>LlSicTox-alphaIV2iv                                                                  | <i>Loxosceles laeta</i>        |
| A0A125SUR4 | NA             | 1             | NA             | NA             | NA             | 4.20           | NA             | NA             | Nonribosomal peptide<br>synthetase ACTTS1                                                                   | <i>Alternaria alternata</i>    |
| B6H060     | NA             | 1             | NA             | NA             | NA             | 3.02           | NA             | NA             | Short-chain<br>dehydrogenase/reductase<br>prx6                                                              | <i>Penicillium rubens</i>      |
| C0JB13     | NA             | 1             | NA             | NA             | NA             | 2.88           | NA             | NA             | Dermonecrotic toxin<br>LlSicTox-alphaIII3iii                                                                | <i>Loxosceles laeta</i>        |
| Q5BLY5     | NA             | 1             | NA             | NA             | NA             | 2.83           | NA             | NA             | Venom acid phosphatase<br>Acph-1                                                                            | <i>Apis mellifera</i>          |
| E5AJX2     | NA             | 1             | NA             | NA             | NA             | 2.72           | NA             | NA             | Snake venom serine protease<br>nikobin                                                                      | <i>Vipera berus nikolskii</i>  |
| P30431     | NA             | 1             | 3              | NA             | NA             | 2.45           | 5.60           | NA             | Zinc metalloproteinase-<br>disintegrin-like jararhagin<br>[Cleaved into: Disintegrin-<br>like jararhagin-C] | <i>Bothrops jararaca</i>       |
| C9K7B8     | NA             | 1             | 1              | NA             | NA             | 2.40           | 2.40           | NA             | Isopropyl malate synthase<br>AMT7                                                                           | <i>Alternaria alternata</i>    |
| Q6UEG8     | NA             | 1             | 1              | NA             | NA             | 2.25           | 2.25           | NA             | Aflatoxin biosynthesis<br>regulatory protein                                                                | <i>Aspergillus parasiticus</i> |
| D8VNS0     | NA             | 1             | NA             | NA             | NA             | 1.95           | NA             | NA             | Zinc metalloproteinase-<br>disintegrin-like                                                                 | <i>Cerberus rynchops</i>       |
| P58912     | NA             | 1             | NA             | NA             | NA             | 1.84           | NA             | NA             | DELTA-alicitoxin-Pse2b                                                                                      | <i>Phyllodiscus semoni</i>     |
| J3SBP3     | NA             | 1             | NA             | NA             | NA             | 1.24           | NA             | NA             | Venom phosphodiesterase 2                                                                                   | <i>Crotalus adamanteus</i>     |

| Accession  | Peptide<br>sP1 | Peptide<br>P2 | Peptide<br>sS1 | Peptide<br>sS2 | %Cov(95)<br>P1 | %Cov(95)<br>P2 | %Cov(95)<br>S1 | %Cov(95)<br>S2 | Protein                                                                                                                           | Organism                         |
|------------|----------------|---------------|----------------|----------------|----------------|----------------|----------------|----------------|-----------------------------------------------------------------------------------------------------------------------------------|----------------------------------|
| P0DPU3     | NA             | 1             | NA             | NA             | NA             | 1.21           | NA             | NA             | Scoloptoxin SSD14 [Cleaved into: SLPTX-SSD14 subunit alpha; SLPTX-SSD14 subunit beta]                                             | <i>Scolopendra dehaani</i>       |
| A0A443HK66 | NA             | 1             | 1              | NA             | NA             | 0.78           | 0.78           | NA             | Highly reducing polyketide synthase VdtX                                                                                          | <i>Byssoschlamys spectabilis</i> |
| Q50LG3     | NA             | 1             | 3              | NA             | NA             | 0.77           | 1.43           | NA             | Highly reducing polyketide synthase AFT9-1                                                                                        | <i>Alternaria alternata</i>      |
| D7PHZ2     | NA             | 1             | 1              | 3              | NA             | 0.71           | 0.71           | 1.48           | Non-reducing polyketide synthase vrtA                                                                                             | <i>Penicillium aethiopicum</i>   |
| P01029     | NA             | 1             | NA             | NA             | NA             | 0.63           | NA             | NA             | Complement C4-B [Cleaved into: Complement C4 beta chain; Complement C4 alpha chain; C4a anaphylatoxin; Complement C4 gamma chain] | <i>Mus musculus</i>              |
| A0A1R3RGJ2 | NA             | NA            | 3              | NA             | NA             | NA             | 6.83           | NA             | Flavin-dependent halogenase otaD                                                                                                  | <i>Aspergillus carbonarius</i>   |

| Accession | Peptide<br>sP1 | Peptide<br>P2 | Peptide<br>sS1 | Peptide<br>sS2 | %Cov(95)<br>P1 | %Cov(95)<br>P2 | %Cov(95)<br>S1 | %Cov(95)<br>S2 | Protein                                                                                                                                                                                                                                                                                                                                                          | Organism                        |
|-----------|----------------|---------------|----------------|----------------|----------------|----------------|----------------|----------------|------------------------------------------------------------------------------------------------------------------------------------------------------------------------------------------------------------------------------------------------------------------------------------------------------------------------------------------------------------------|---------------------------------|
| P01027    | NA             | NA            | 3              | 1              | NA             | NA             | 2.77           | 0.72           | Complement C3 [Cleaved into: Complement C3 beta chain; C3-beta-c; Complement C3 alpha chain; C3a anaphylatoxin; Acylation stimulating protein; Complement C3b alpha' chain; Complement C3c alpha' chain fragment 1; Complement C3dg fragment; Complement C3g fragment; Complement C3d fragment; Complement C3f fragment; Complement C3c alpha' chain fragment 2] | <i>Mus musculus</i>             |
| Q6PTD5    | NA             | NA            | 2              | 1              | NA             | NA             | 29.41          | 22.06          | Alpha-conotoxin Lp1.1                                                                                                                                                                                                                                                                                                                                            | <i>Conus leopardus</i>          |
| E2JFG2    | NA             | NA            | 2              | NA             | NA             | NA             | 4.52           | NA             | Dual function macrocyclase-peptidase POPB                                                                                                                                                                                                                                                                                                                        | <i>Amanita bisporigera</i>      |
| C5NN18    | NA             | NA            | 2              | NA             | NA             | NA             | 3.63           | NA             | Acyl-CoA synthetase ACTT5                                                                                                                                                                                                                                                                                                                                        | <i>Alternaria alternata</i>     |
| C9K7C0    | NA             | NA            | 2              | NA             | NA             | NA             | 3.53           | NA             | O-methyltransferase AMT9                                                                                                                                                                                                                                                                                                                                         | <i>Alternaria alternata</i>     |
| P82426    | NA             | NA            | 1              | NA             | NA             | NA             | 50.00          | NA             | M-poneritoxin-Ng1d                                                                                                                                                                                                                                                                                                                                               | <i>Neoponera goeldii</i>        |
| H9N3R7    | NA             | NA            | 1              | NA             | NA             | NA             | 48.39          | NA             | Alpha-conotoxin Li1.12                                                                                                                                                                                                                                                                                                                                           | <i>Conus lividus</i>            |
| P0DSL8    | NA             | NA            | 1              | 1              | NA             | NA             | 45.45          | 45.45          | U1-pseudomyrmecitoxin-Pt1 subunit LS2                                                                                                                                                                                                                                                                                                                            | <i>Pseudomyrmex triplarinus</i> |

| Accession | Peptide<br>sP1 | Peptide<br>P2 | Peptide<br>sS1 | Peptide<br>sS2 | %Cov(95)<br>P1 | %Cov(95)<br>P2 | %Cov(95)<br>S1 | %Cov(95)<br>S2 | Protein                                                                 | Organism                             |
|-----------|----------------|---------------|----------------|----------------|----------------|----------------|----------------|----------------|-------------------------------------------------------------------------|--------------------------------------|
| D2Y170    | NA             | NA            | 1              | 1              | NA             | NA             | 22.37          | 22.37          | Conotoxin Cal5a L2 [Cleaved into: Conotoxin Cal5b L2; Conotoxin Cal5.1] | <i>Californiconus californicus</i>   |
| P0DPY2    | NA             | NA            | 1              | NA             | NA             | NA             | 15.63          | NA             | U-scoloptoxin(06)-Sm1a                                                  | <i>Scolopendra morsitans</i>         |
| P0DPV1    | NA             | NA            | 1              | NA             | NA             | NA             | 11.34          | NA             | U-scoloptoxin(10)-Ssd2a                                                 | <i>Scolopendra dehaani</i>           |
| P0DQP2    | NA             | NA            | 1              | NA             | NA             | NA             | 9.52           | NA             | Venom protein SynTx                                                     | <i>Dendroaspis jamesoni jamesoni</i> |
| D9U2A1    | NA             | NA            | 1              | NA             | NA             | NA             | 9.30           | NA             | Neurotoxin LmNaTx17                                                     | <i>Lychas mucronatus</i>             |
| P82114    | NA             | NA            | 1              | 1              | NA             | NA             | 8.26           | 8.26           | Basic phospholipase A2 homolog MjTX-I                                   | <i>Bothrops moojeni</i>              |
| D6C4I6    | NA             | NA            | 1              | NA             | NA             | NA             | 8.07           | NA             | Conotoxin Cl14.12                                                       | <i>Californiconus californicus</i>   |
| Q4LCT2    | NA             | NA            | 1              | NA             | NA             | NA             | 7.41           | NA             | Toxin-like peptide AaF1CA5                                              | <i>Androctonus australis</i>         |
| Q3HXY3    | NA             | NA            | 1              | 2              | NA             | NA             | 7.02           | 7.02           | Venom nerve growth factor 1                                             | <i>Pseudechis australis</i>          |
| Q9BJV8    | NA             | NA            | 1              | 1              | NA             | NA             | 7.00           | 7.00           | Omega-hexatoxin-Asp2a                                                   | <i>Atrax sp.</i>                     |
| P0DPZ8    | NA             | NA            | 1              | NA             | NA             | NA             | 5.86           | NA             | U-scoloptoxin(11)-Sm3a                                                  | <i>Scolopendra morsitans</i>         |
| D2Y255    | NA             | NA            | 1              | NA             | NA             | NA             | 5.31           | NA             | U11-theraphotoxin-Hhn1a                                                 | <i>Cyriopagopus hainanus</i>         |
| W6Q4Q9    | NA             | NA            | 1              | NA             | NA             | NA             | 5.26           | NA             | Aristolochene synthase                                                  | <i>Penicillium roqueforti</i>        |



| Accession  | Peptide<br>sP1 | Peptide<br>P2 | Peptide<br>sS1 | Peptide<br>sS2 | %Cov(95)<br>P1 | %Cov(95)<br>P2 | %Cov(95)<br>S1 | %Cov(95)<br>S2 | Protein                                                                                                                | Organism                       |
|------------|----------------|---------------|----------------|----------------|----------------|----------------|----------------|----------------|------------------------------------------------------------------------------------------------------------------------|--------------------------------|
| C9K1N0     | NA             | NA            | 1              | NA             | NA             | NA             | 5.09           | NA             | Abhydrolase domain-containing protein ACTT2-3                                                                          | <i>Alternaria alternata</i>    |
| Q8QG86     | NA             | NA            | 1              | 1              | NA             | NA             | 3.89           | 3.89           | Snake venom serine protease BITS01A                                                                                    | <i>Bothrops insularis</i>      |
| A0A2G5ICB4 | NA             | NA            | 1              | NA             | NA             | NA             | 3.02           | NA             | Cercosporin biosynthesis regulatory protein CTB8                                                                       | <i>Cercospora beticola</i>     |
| Q4WMJ9     | NA             | NA            | 1              | NA             | NA             | NA             | 2.99           | NA             | Probable aminotransferase gliI                                                                                         | <i>Neosartorya fumigata</i>    |
| D7PI00     | NA             | NA            | 1              | NA             | NA             | NA             | 2.10           | NA             | Transcription factor vrtR1                                                                                             | <i>Penicillium aethiopicum</i> |
| C9K7C2     | NA             | NA            | 1              | NA             | NA             | NA             | 2.08           | NA             | Transcription activator AMTR1                                                                                          | <i>Alternaria alternata</i>    |
| A0A2G5IC53 | NA             | NA            | 1              | NA             | NA             | NA             | 1.61           | NA             | Dual O-methyltransferase/FAD-dependent monooxygenase CTB3 [Includes: O-methyltransferase; FAD-dependent monooxygenase] | <i>Cercospora beticola</i>     |
| Q50LG1     | NA             | NA            | 1              | NA             | NA             | NA             | 1.37           | NA             | Cytochrome P450 monooxygenase AFT11-1                                                                                  | <i>Alternaria alternata</i>    |
| K4RNX9     | NA             | NA            | NA             | 1              | NA             | NA             | NA             | 26.83          | Alpha-conotoxin TxIB                                                                                                   | <i>Conus textile</i>           |
| P0CJ19     | NA             | NA            | NA             | 1              | NA             | NA             | NA             | 22.03          | Venom protein 27.7                                                                                                     | <i>Lychas mucronatus</i>       |
| A3F7X2     | NA             | NA            | NA             | 1              | NA             | NA             | NA             | 11.21          | U3-theraphotoxin-Lsp1a                                                                                                 | <i>Lasiodora sp.</i>           |

| Accession | Peptide<br>sP1 | Peptide<br>P2 | Peptide<br>sS1 | Peptide<br>sS2 | %Cov(95)<br>P1 | %Cov(95)<br>P2 | %Cov(95)<br>S1 | %Cov(95)<br>S2 | Protein                                                                                                                                                                                                                                                                                                                                                                                                                                                        | Organism                       |
|-----------|----------------|---------------|----------------|----------------|----------------|----------------|----------------|----------------|----------------------------------------------------------------------------------------------------------------------------------------------------------------------------------------------------------------------------------------------------------------------------------------------------------------------------------------------------------------------------------------------------------------------------------------------------------------|--------------------------------|
| A8YPR6    | NA             | NA            | NA             | 1              | NA             | NA             | NA             | 7.47           | Snake venom metalloprotease inhibitor 02D01 [Cleaved into:<br>Tripeptide pEKW 1;<br>Tripeptide pEKW 2;<br>Tripeptide pEKW 3;<br>Tripeptide pEKW 4;<br>Tripeptide pEKW 5;<br>Tripeptide pEKW 6;<br>Tripeptide pEKW 7;<br>Tripeptide pEKW 8;<br>Tripeptide pEKW 9;<br>Tripeptide pEKW 10;<br>Tripeptide pEKW 11; Poly-His-poly-Gly peptide 4; Poly-His-poly-Gly peptide 3; Poly-His-poly-Gly peptide 2; Poly-His-poly-Gly peptide 1; C-type natriuretic peptide] | <i>Echis ocellatus</i>         |
| Q1W694    | NA             | NA            | NA             | 1              | NA             | NA             | NA             | 6.89           | Dermonecrotic toxin<br>LiSicTox-betaID1                                                                                                                                                                                                                                                                                                                                                                                                                        | <i>Loxosceles intermedia</i>   |
| Q2XXP4    | NA             | NA            | NA             | 1              | NA             | NA             | NA             | 4.66           | Cysteine-rich venom protein<br>TRI1                                                                                                                                                                                                                                                                                                                                                                                                                            | <i>Trimorphodon biscutatus</i> |
| C0JAS6    | NA             | NA            | NA             | 1              | NA             | NA             | NA             | 4.40           | Dermonecrotic toxin<br>LspaSicTox-alphaIA2i                                                                                                                                                                                                                                                                                                                                                                                                                    | <i>Loxosceles spadicea</i>     |
| D7UPN2    | NA             | NA            | NA             | 1              | NA             | NA             | NA             | 4.37           | Trans-enoyl reductase<br>ACTTS2                                                                                                                                                                                                                                                                                                                                                                                                                                | <i>Alternaria alternata</i>    |

| Accession  | Peptide<br>sP1 | Peptide<br>P2 | Peptide<br>sS1 | Peptide<br>sS2 | %Cov(95)<br>P1 | %Cov(95)<br>P2 | %Cov(95)<br>S1 | %Cov(95)<br>S2 | Protein                                                                                                                                   | Organism                    |
|------------|----------------|---------------|----------------|----------------|----------------|----------------|----------------|----------------|-------------------------------------------------------------------------------------------------------------------------------------------|-----------------------------|
| Q1ELU5     | NA             | NA            | NA             | 1              | NA             | NA             | NA             | 4.35           | M-zodatoxin-Lt4a [Cleaved into: Repetitive polypeptide element type 1a; Repetitive polypeptide element type 1b; M-zodatoxin-Lt4a peptide] | <i>Lachesana tarabaei</i>   |
| A2R6G7     | NA             | NA            | NA             | 1              | NA             | NA             | NA             | 3.15           | Flavin-dependent halogenase otaD                                                                                                          | <i>Aspergillus niger</i>    |
| Q63530     | NA             | NA            | NA             | 1              | NA             | NA             | NA             | 2.87           | Phosphotriesterase-related protein                                                                                                        | <i>Rattus norvegicus</i>    |
| A0A2P1BRP3 | NA             | NA            | NA             | 1              | NA             | NA             | NA             | 2.14           | Cytolytic toxin-beta                                                                                                                      | <i>Scorpaena plumieri</i>   |
| C9K7F3     | NA             | NA            | NA             | 1              | NA             | NA             | NA             | 2.09           | AM-toxin biosynthesis protein 12-2                                                                                                        | <i>Alternaria alternata</i> |
| P0C7B0     | NA             | NA            | NA             | 1              | NA             | NA             | NA             | 1.48           | Zinc metalloproteinase-disintegrin-like brevilysin H6 [Cleaved into: p45K; Disintegrin-like p29K]                                         | <i>Gloydus brevicaudus</i>  |

| Accession | Peptide<br>sP1 | Peptide<br>P2 | Peptide<br>sS1 | Peptide<br>sS2 | %Cov(95)<br>P1 | %Cov(95)<br>P2 | %Cov(95)<br>S1 | %Cov(95)<br>S2 | Protein                                                                                                                                                                                                                                                                                                                                                          | Organism          |
|-----------|----------------|---------------|----------------|----------------|----------------|----------------|----------------|----------------|------------------------------------------------------------------------------------------------------------------------------------------------------------------------------------------------------------------------------------------------------------------------------------------------------------------------------------------------------------------|-------------------|
| P01025    | NA             | NA            | NA             | 1              | NA             | NA             | NA             | 0.48           | Complement C3 [Cleaved into: Complement C3 beta chain; C3-beta-c; Complement C3 alpha chain; C3a anaphylatoxin; Acylation stimulating protein; Complement C3b alpha' chain; Complement C3c alpha' chain fragment 1; Complement C3dg fragment; Complement C3g fragment; Complement C3d fragment; Complement C3f fragment; Complement C3c alpha' chain fragment 2] | <i>Sus scrofa</i> |

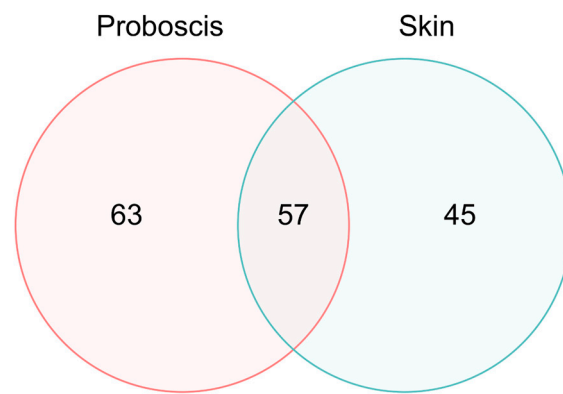

**Figure S1.** Venn Diagram illustrating the distribution of the proteins identified in *Glycera alba*'s proboscis and skin.

---

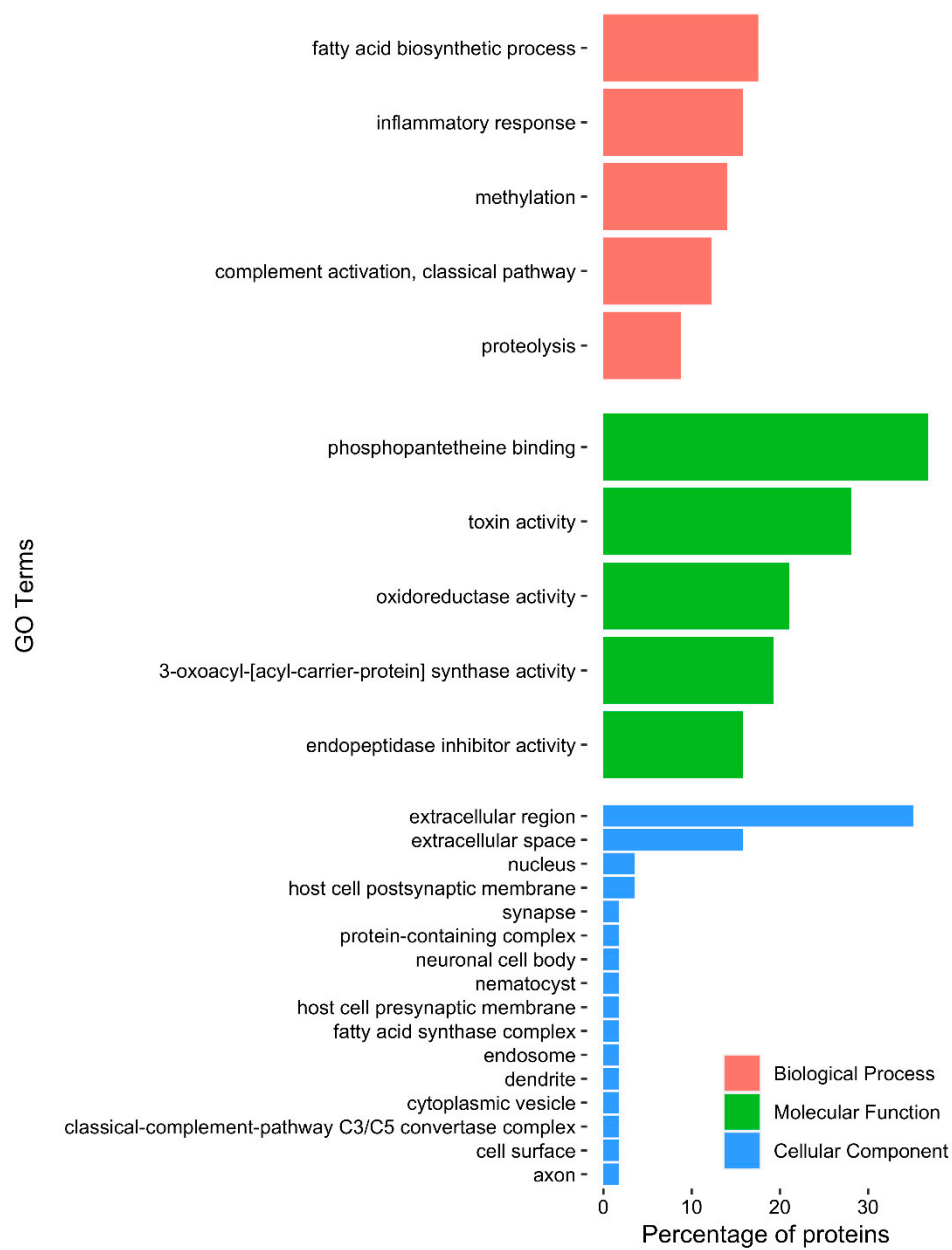

**Figure S2.** Top5 GO Terms of the proteins identified in common between the two organs. The horizontal bar chart shows the percentage of the proteins identified in common between *Glycera alba*'s proboscis and skin, related to each GO Term. The same protein can bear multiple GO Terms.

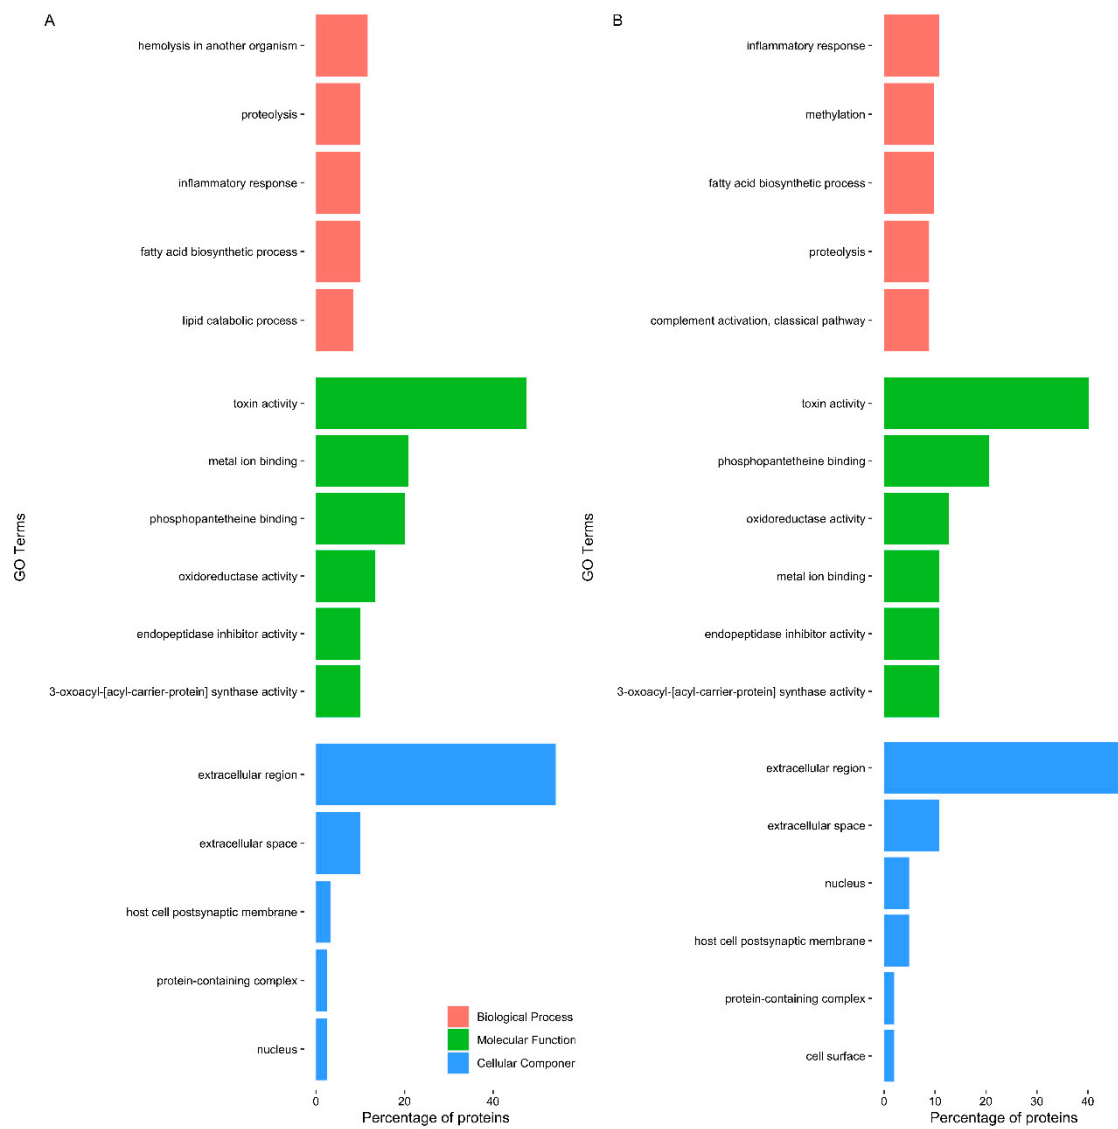

**Figure S3.** Top5 GO Terms of all proteins identified. The horizontal bar chart shows the percentage of all proteins identified. A) in *Glycera alba*'s proboscis. B) in *Glycera alba*'s skin, related to each GO Term. The same protein can bear multiple GO Terms.

## References

18. von Reumont, B.M.; Campbell, L.I.; Richter, S.; Hering, L.; Sykes, D.; Hetmank, J.; Jenner, R.A.; Bleidorn, C. A polychaete's powerful punch: Venom gland transcriptomics of *Glycera* reveals a complex cocktail of toxin homologs. *Genome Biol. Evol.* 2014, 6, 2406–2423, doi: 10.1093/gbe/evu190.
22. Richter, S.; Helm, C.; Meunier, F.A.; Hering, L.; Campbell, L.I.; Drukewitz, S.H.; Undheim, E.A.B.; Jenner, R.A.; Schiavo, G.; Bleidorn, C. Comparative analyses of glycerotoxin expression unveil a novel structural organization
56. Nagai, H. Marine protein toxins. In *Handbook of Marine Natural Products*; Fattorusso, E., Gerwick, W., Tagliatalata-Scafati, O.; Springer: Dordrecht, 2012; 1389–1420, doi:10.1007/978-90-481-3834-0\_29.
57. Liscovitch, M. Receptor-regulated phospholipases. *Encyclopedia of Endocrine Diseases*. 2004, 4, 167–173.
58. Rangaraju, S.; Khoo, K.K.; Feng, Z.P.; Crossley, G.; Nugent, D.; Khaytin, I.; Chi, V.; Pham, C.; Calabresi, P.; Pennington, M.W.; et al. Potassium channel modulation by a toxin domain in matrix metalloprotease 23. *J Biol Chem.* 2010, 285, 9124–9136, doi:10.1074/jbc.M109.071266.
59. Chew, J.S.C.; Saleem, M.; Florkowski C.M.; George, P.M. Cystatin C—A Paradigm of evidence based laboratory medicine. *Clin Bio-chem Rev.* 2008, 29, 47–62, PMID 18787643.
60. Durani, V.; Magliery, T.J. Protein engineering and stabilization from sequence statistics: variation and covariation analysis. *Meth. Enzymol.* 2013, 523, 237–256, doi:10.1016/B978-0-12-394292-0.00011-4.
61. Singer, E.; Markó, L.; Paragas, N.; Barasch, J.; Dragun, D.; Müller, D.N.; Budde, K.; Schmidt-Ott, K.M. Neutrophil gelatinase-associated lipocalin: pathophysiology and clinical applications. *Acta. Physiol.* 2013, 207, 663–672, doi:10.1111/apha.12054.
62. Jiang, R.; Zhang, B.; Kurokawa, K.; So, Y.; Kim, E.; Hwang, H.O.; Lee, J.; Shiratsuchi, A.; Zhang, J.; Nakanishi, Y. et al. 93-kDa Twin-domain serine protease inhibitor (serpin) has a regulatory function on the beetle toll proteolytic signaling cascade. *J. Biol. Chem.* 2011, 286, 35087–35095, doi:10.1074/jbc.M111.277343.
63. Darwiche, R.; Kelleher, A.; Hudspeth E.M; Schneiter, R.; Asojo, O.A. Structural and functional characterization of the CAP domain of pathogen-related yeast 1 (Pry1) protein. *Sci. Rep.* 2006, 6, 28838, doi:10.1038/srep28838.
64. Lopes-Ferreira, M.; Magalhães, G.S.; Fernandez J.H.; Junqueira-de-Azevedo, I.d.L.; Le Ho, P.; Lima, C.; Valente, R.H.; Moura-da-Silva, A.M. Structural and biological characterization of Nattectin, a new C-type lectin from the venomous fish *Thalassophryne nattereri*. *Biochimie.* 2011, 93, 971–980, doi:10.1016/j.biochi.2011.03.001.
65. Hamid, R. et al., 2013. Chitinases: An update. *J Pharm Bioallied Sci.* 5, 21–29, doi: 10.4103/0975-7406.106559.
66. Barth, T.; Coelho Mandacaru, S.; Charneau, S.; Valle de Souza, M.; Ornelas Ricart, C.A.; Ferreira Noronha, E.; Araújo Souza, A.; de Freitas, S.M.; Roespstorff, P.; Fontes, W. et al. Biochemical and structural characterization of a protein complex containing a hyaluronidase and a CRISP-like protein isolated from the venom of the spider *Acanthoscurria natalensis*. *J Proteomics.* 2019, 192, 102–113, doi:10.1016/j.jprot.2018.08.012.
67. Shen, L.R.; Ding, M.H.; Zhang, L.W.; Zhang, W.G.; Liu, L.; Li, D. Expression of a bee venom phospholipase A2 from *Apis cerana cerana* in the baculovirus-insect cell. *J Zhejiang Univ Sci B.* 2010, 11, 342–349. doi:10.1631/jzus.B0900254.
68. Murayama, N.; Saguchi, K.; Mentele, R.; Assakura, M.T.; Ohi, H.; Fujita, Y.; Camargo, A.C.; Higuchi, S.; Serrano, S.M. The unusual high molecular mass of Bothrops protease A, a trypsin-like serine peptidase from the venom of *Bothrops jararaca*, is due to its high carbohydrate content. *Biochim Biophys Acta Proteins Proteom.* 2003, 1652, 1–6, doi:10.1016/j.bbapap.2003.08.001.
69. Lee, B.R.; Takeuchi, M.; Kobayashi, Y. Purification and characterization of serine carboxypeptidases from *Absidia zychnae*. *Biosci. Biotech. Biochem.* 1993, 57, 618–622. doi:10.1271/bbb-.57.618.



70. Price, D.R.G.; Bell, H.A.; Hinchliffe, G.; Fitches, E.; Weaver, R.; Gatehouse, J.A. A venom metalloproteinase from the parasitic wasp *Eulophus pennicornis* is toxic towards its host, tomato moth (*Lacanobia oleracae*). *Insect Mol Biol.* 2009, 18, 195-202. doi:10.1111/j.1365-2583.2009.00864.x.of the bloodworm venom system. *BMC Evol. Biol.* **2017**, 17, 1–19, doi: 10.1186/s12862-017-0904-4
